# Supplementary material for: Synthesis and in Vitro Antimicrobial Evaluation of New N-Heterocyclic Diquaternary Pyridinium Compounds
Source: PubMed Central journal article supplement (PMC6271789; doi:10.3390/molecules190811572), 2014-08-05

## Supplementary Information

**Figure S1.** 1-[2-(2-Nitrophenyl)-2-oxoethyl]-4-(2-{1-[2-(2-nitrophenyl)-2-oxoethyl]pyridin-1-ium-4-yl}ethyl)pyridin-1-ium dibromide (**4a**).

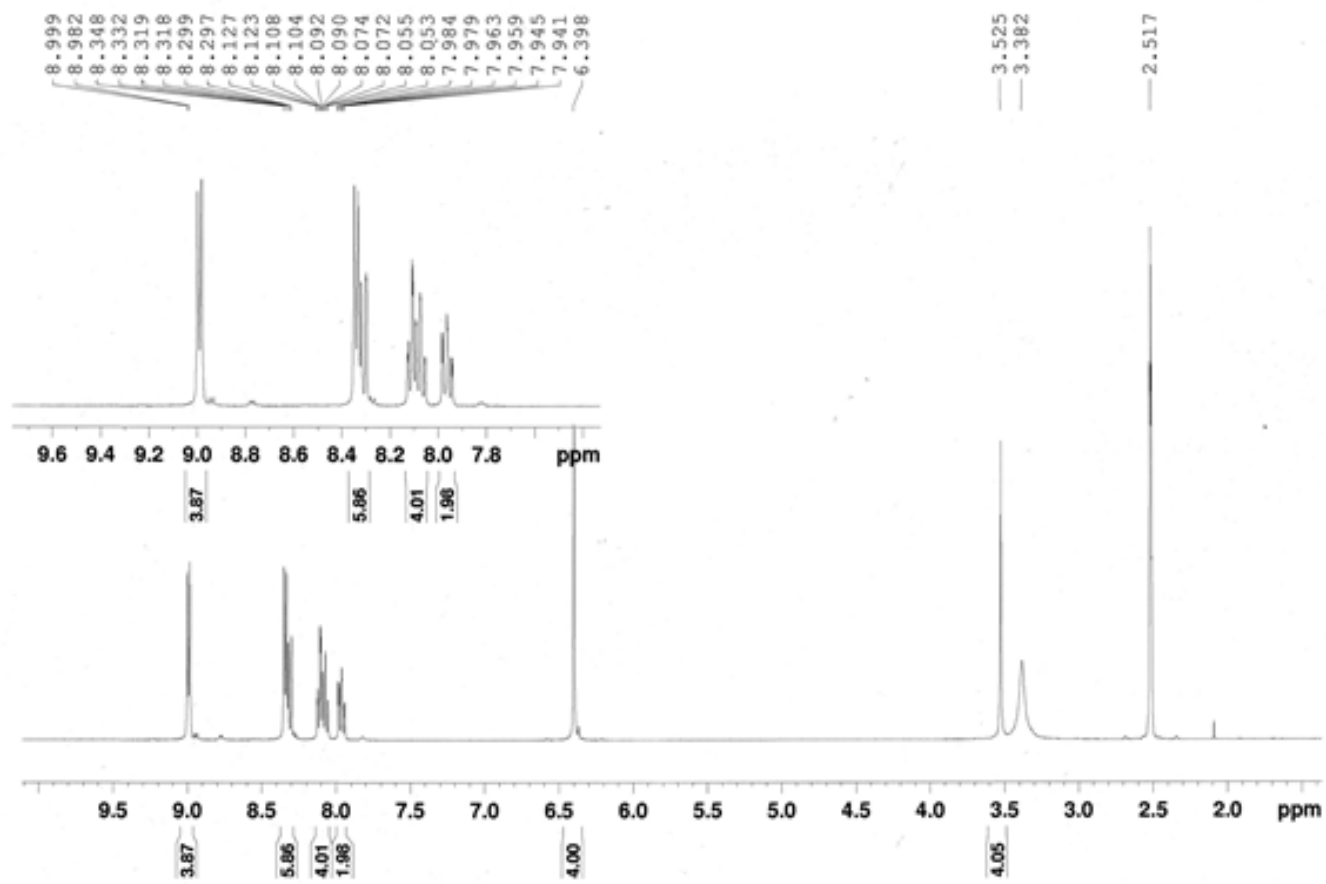

**Figure S2.** 1-[2-(2-Methoxyphenyl)-2-oxoethyl]-4-(2-{1-[2-(2-methoxyphenyl)-2-oxoethyl]pyridin-1-ium-4-yl}ethyl)pyridin-1-ium dibromide (**4b**).

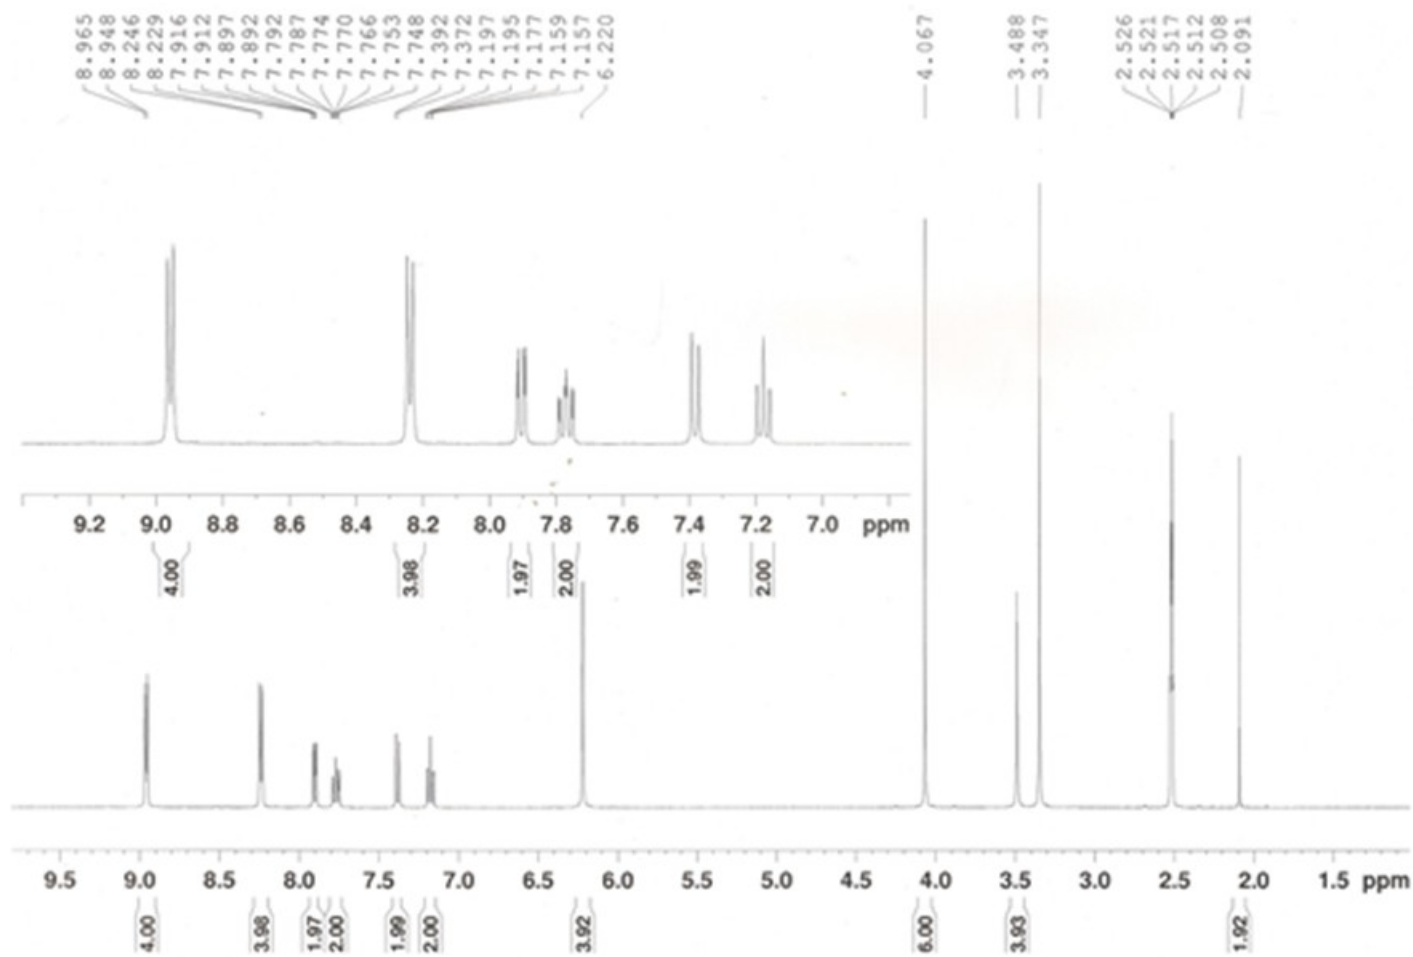

**Figure S3.** 1-[2-Oxo-2-(2-oxo-2H-chromen-3-yl)ethyl]-4-(2-{1-[2-oxo-2-(2-oxo-2H-chromen-3-yl)ethyl]pyridin-1-ium-4-yl}ethyl)pyridin-1-ium dibromide (**4c**).

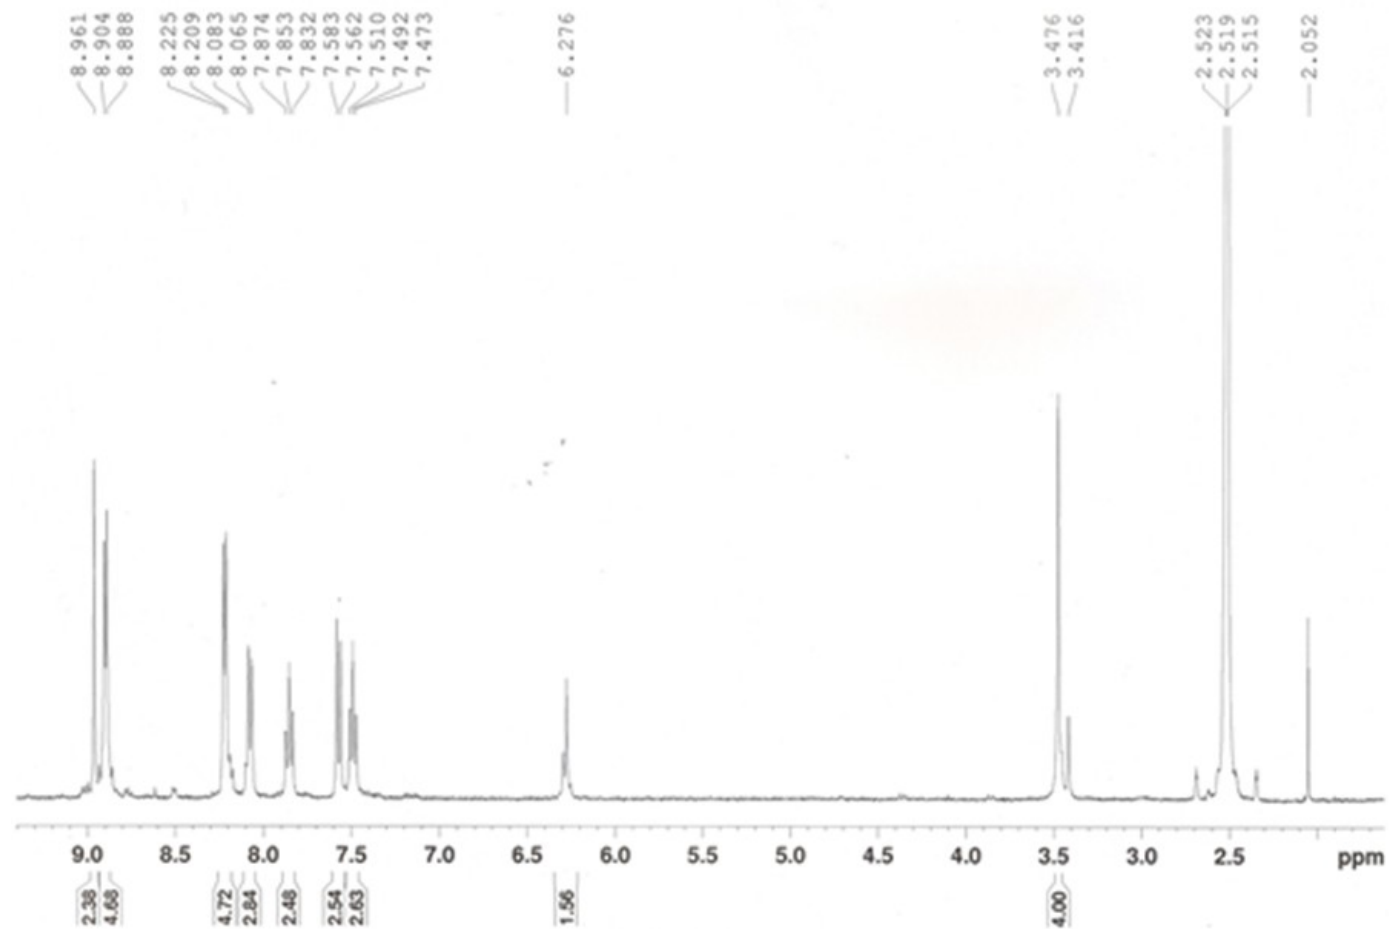

**Figure S4.** 1-{2-[(4R)-4-Benzyl-2-oxo-1,3-oxazolidin-3-yl]-2-oxoethyl}-4-[2-(1-{2-[(4S)-4-benzyl-2-oxo-1,3-oxazolidin-3-yl]-2-oxoethyl}pyridin-1-ium-4-yl)ethyl]pyridin-1-ium dichloride (**4e**).

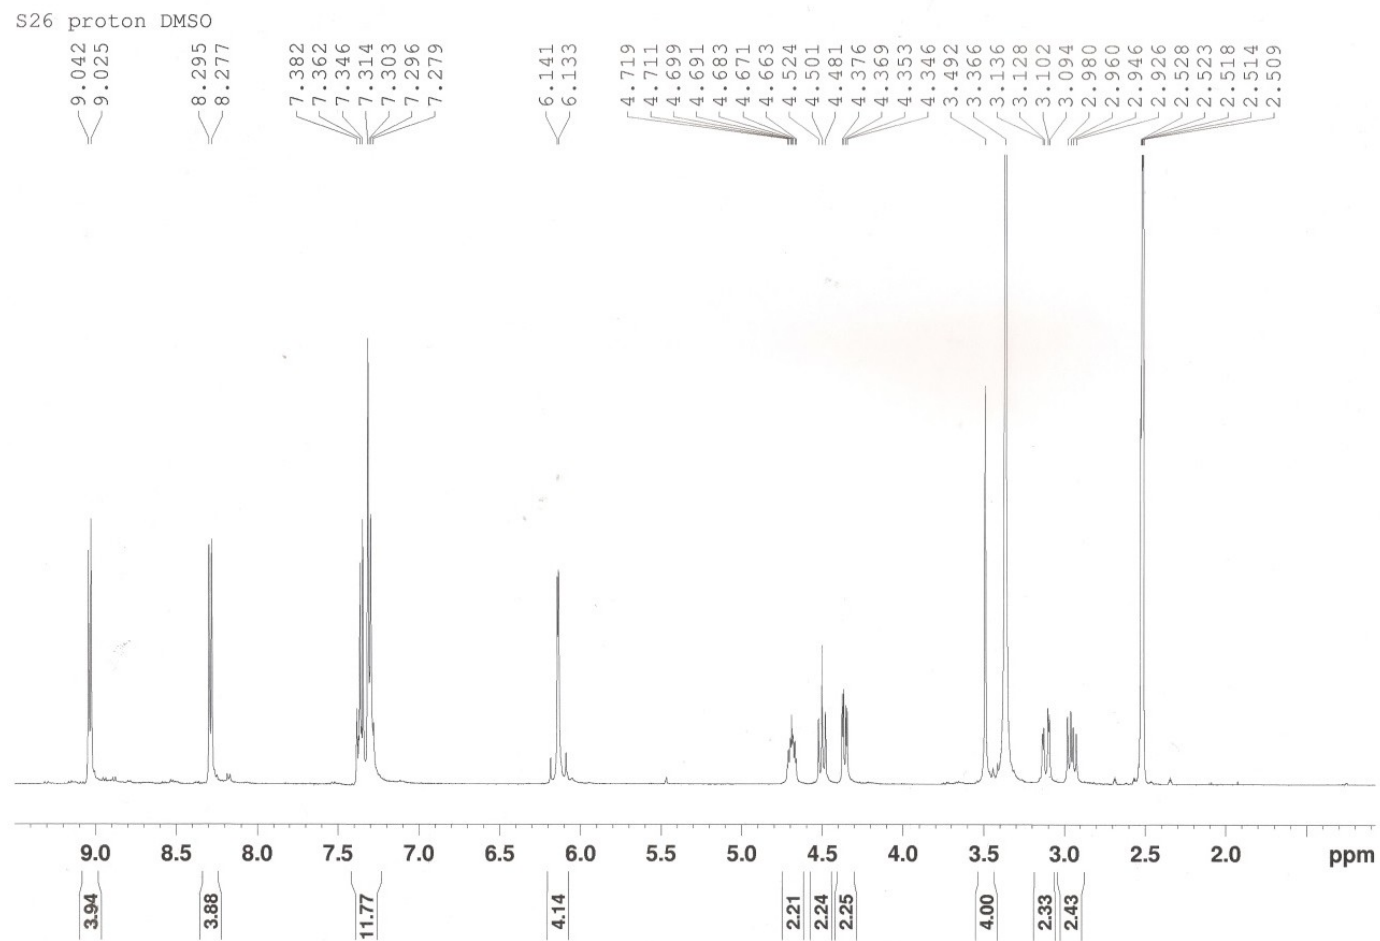

**Figure S5.** 1-[2-(2-Methoxyphenyl)-2-oxoethyl]-4-{1-[2-(2-methoxyphenyl)-2-oxoethyl]pyridin-1-ium-4-yl} pyridin-1-ium dibromide (**5b**).

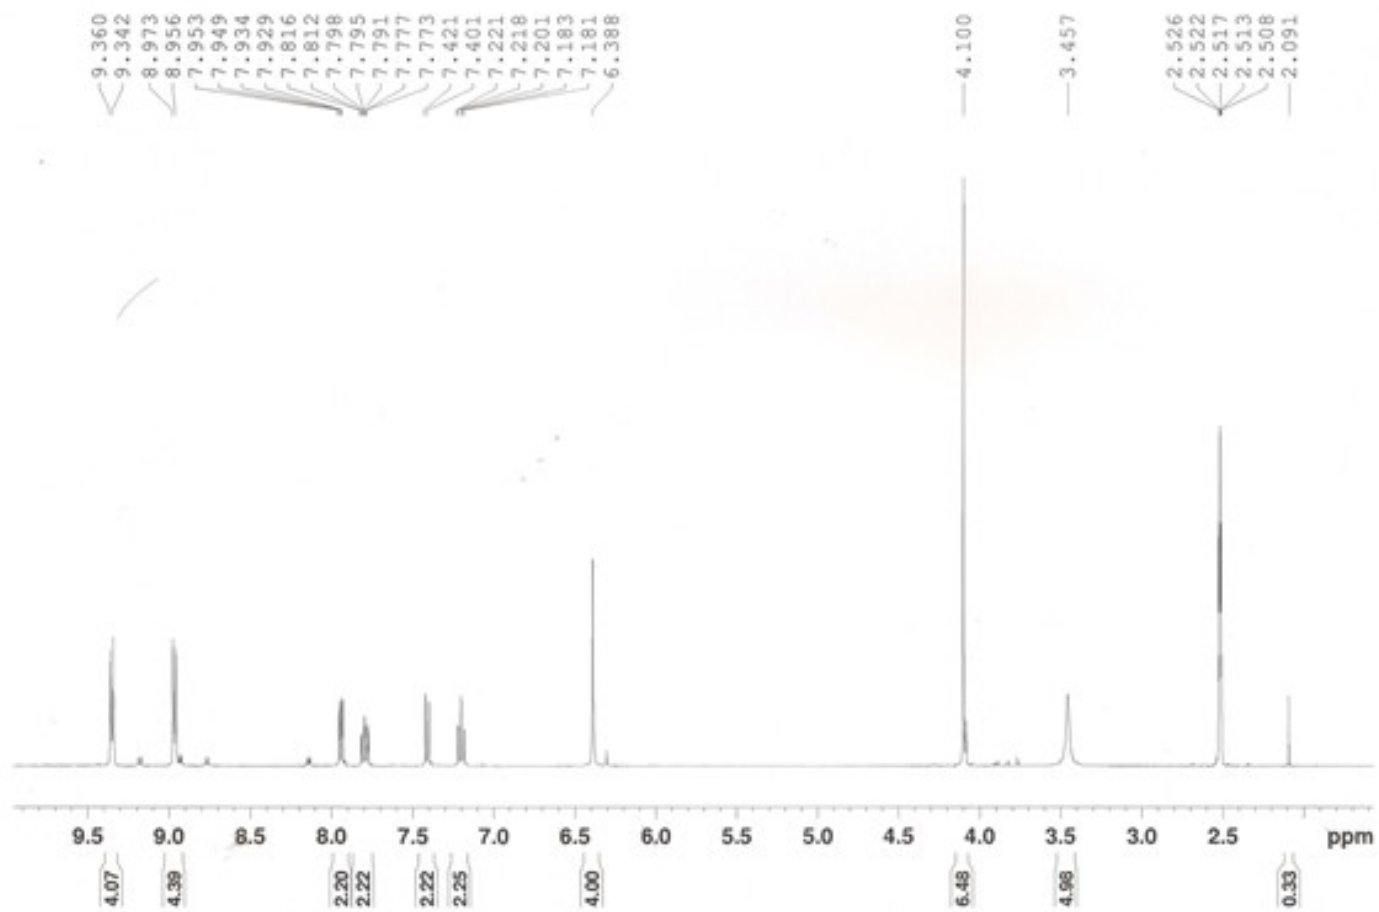

Supplement: molecules-19-11572-s001.pdf [file molecules-19-11572-s001.pdf]
